# Supplementary material for: Within-person coupling of estradiol, testosterone, and cortisol in women athletes
Source: PeerJ. 2020 Jan 24;8:e8402. doi: 10.7717/peerj.8402 (PMC6984338; doi:10.7717/peerj.8402)
Supplement: Supplemental Information 2 — For each participant, data points show salivary levels of testosterone (Test), cortisol (Cort),and estradiol (Est) for samples obtained at neutral-day (Baseline) and before warm-up, after warm-up, immediately after, and 30 min after each of two matches (1A, 1B, 1C, 1D and 2A, 2B, 2C, 2D respectively). Cortisol is expressed as ug/dl; testosterone and estradiol are expressed as pg/ml. Participants were queried about their use of oral contraception and identified as either non-users (0) or users (1). For each match,participants either played (1) or did not play (0). [file peerj-08-8402-s002.xlsx]

## Sheet: Edwards & Turan, Dataset for so
PlayerID	OralContraception	Played1	Played2	CortBaseline	Cort1A	Cort1B	Cort1C	Cort1D	TestBaseline	Test1A	Test1B	Test1C	Test1D	EstradiolBaseline	Est1A	Est1B	Est1C	Est1D	Cort2A	Cort2B	Cort2C	Cort2D	Test2A	Test2B	Test2C	Test2D	Est2A	Est2B	Est2C	Est2D
1224	0	1	1	0.349	0.456	0.575	0.303	0.282	81.1	84.541	118.942	104.803	87.26	4.526	3.706	5.631	3.372	4.241	0.508	0.461	0.384	0.24	86.727	115.931	121.195	83.907	4.386	6.222	4.556	3.836
9748	0	0	0	0.231	0.164	0.183	0.171	0.138	38.831	29.945	43.182	39.552	37.548	1.834	2.729	3.513	2.335	2.834	0.137	0.174	0.181	0.107	33.713	48.321	38.026	35.914	2.368	4.544	2.406	2.292
3225	1	1	0	0.213	0.168	0.173	0.587	0.464	48.897	43.814	45.962	58.37	52.185	2.878	3.301	4.598	2.558	2.496	0.151	0.113	0.14	0.148	38.066	37.176	40.09	41.076	4.198	4.053	2.441	2.66
4254	0	1	1	0.345	0.756	0.454	0.421	0.332	63.814	52.533	67.138	68.913	50.192	3.401	3.619	4.182	2.912	3.151	0.922	0.461	0.596	0.358	62.259	74.684	82.744	61.46	4.11	6.635	4.585	4.431
7749	1	0	1	0.17	0.297	#NULL!	#NULL!	#NULL!	38.64	37.682	#NULL!	#NULL!	#NULL!	2.231	4.064	#NULL!	#NULL!	#NULL!	0.384	0.338	0.574	0.352	41.031	49.428	45.524	35.337	3.352	4.16	2.488	2.665
7931	1	1	1	0.221	0.224	0.358	0.626	0.695	39.247	42.534	44.312	46.86	33.992	2.027	3.365	3.469	3.251	2.47	0.242	0.411	0.475	0.375	34.607	50.383	42.902	23.849	2.294	2.669	2.323	3.141
4598	1	1	1	0.648	0.483	0.298	1.103	1.049	46.415	37.411	39.484	45.992	34.697	#NULL!	2.953	3.555	2.396	1.729	0.419	0.195	0.714	0.537	40.482	40.687	50.963	33.408	3.616	4.799	3.526	3.689
2157	0	1	1	0.113	0.265	0.213	0.465	0.748	53.626	56.141	63.638	89.228	98.259	4.346	2.866	3.208	3.085	2.619	0.234	0.29	1.003	1.361	57.816	89.551	104.341	88.859	2.759	4.595	#NULL!	3.173
1569	0	0	0	0.183	0.215	0.136	0.171	0.131	43.373	35.492	34.74	43.24	39.12	2.49	2.55	1.84	1.99	2.07	#NULL!	#NULL!	#NULL!	#NULL!	#NULL!	#NULL!	#NULL!	#NULL!	#NULL!	#NULL!	#NULL!	#NULL!
1348	0	1	1	0.368	0.649	0.323	0.879	0.798	39.993	39.547	44.291	62.774	43.646	2.95	2.62	3.01	3.65	3.05	0.227	0.415	0.434	0.376	29.593	56.33	65.81	55.59	1.79	2.65	2.63	3.21
6189	1	1	1	0.156	0.198	0.285	0.518	0.56	35.93	55.323	63.301	62.253	48.888	2.16	2.7	4.415	3.198	6.37	0.187	0.237	0.66	0.693	51.01	69.865	72.7	49.398	3.275	5.4	4.363	3.714
9125	1	0	0	0.248	0.358	0.202	0.191	0.158	59.793	49.783	53.705	36.941	27.671	4.074	3.778	4.191	7.162	2.926	#NULL!	#NULL!	#NULL!	#NULL!	#NULL!	#NULL!	#NULL!	#NULL!	#NULL!	#NULL!	#NULL!	#NULL!
3136	1	1	1	0.147	0.371	0.303	1.16	1.274	48.791	53.288	64.363	94.119	76.781	3.396	4.318	7.114	4.825	4.278	0.307	0.474	0.618	0.499	48.549	65.605	78.023	58.89	4.353	5.851	5.163	6.6
9161	1	1	0	0.345	0.201	0.207	0.391	0.329	44.01	30.59	44.858	57.003	49.86	4.01	3.79	3.45	3.52	3.45	#NULL!	#NULL!	#NULL!	#NULL!	#NULL!	#NULL!	#NULL!	#NULL!	#NULL!	#NULL!	#NULL!	#NULL!
3543	1	1	1	0.187	0.496	0.223	0.805	1.112	66.709	56.323	74.76	117.265	94.88	3.27	3.87	4.52	5.7	4.45	0.216	0.243	0.571	0.715	43.046	71.038	98.999	68.31	2.98	4.13	3.98	3.41
6502	1	1	1	0.188	0.356	0.315	0.605	0.686	33.289	57.91	74.794	72.272	67.905	2.88	5.29	5.12	5.03	4.24	0.411	0.383	0.919	0.633	63.573	64.34	88.605	65.684	3.7	4.36	4.2	4
5035	1	1	1	0.16	0.315	0.201	0.762	0.615	35.917	42.599	40.553	59.387	58.185	2.71	3.29	4.03	4.43	3.9	0.308	0.27	0.606	0.525	47.372	60.09	60.94	48.562	4.59	6.14	4.31	4.52
7638	0	0	0	0.243	0.378	0.221	0.179	0.228	58.87	60.754	90.563	80.794	75.464	2.71	4.28	8.92	6.55	6.79	0.209	0.259	0.095	0.102	55.561	82.763	51.517	62.105	3.4	5.59	3.52	5.9
5326	1	1	1	0.182	0.312	0.307	1.482	1.319	56.726	59.3	85.11	108.21	84.92	3.68	4.61	6.04	4.99	3.39	0.313	0.244	1.231	1.24	57.18	67.17	95.89	71.75	4.71	5.76	3.49	4.47
8751	1	0	0	0.391	0.331	0.235	0.196	0.191	61.126	52.16	67.1	64.27	55.66	4.77	3.51	4.5	3.66	3.43	#NULL!	#NULL!	#NULL!	#NULL!	#NULL!	#NULL!	#NULL!	#NULL!	#NULL!	#NULL!	#NULL!	#NULL!
4871	0	1	1	0.365	0.255	0.345	0.683	0.614	65.88	61.69	91.94	96.07	73.82	2.86	4.85	5.61	4.56	4.37	0.259	0.129	0.525	0.388	55.09	62.56	91.11	74.32	3.29	3.57	3.12	3.09
2874	1	1	1	0.423	0.485	0.377	0.439	0.388	65.79	62.2	69.72	78.35	72.71	3.08	5.64	4.48	4.45	6.05	0.484	0.379	0.55	0.444	57.98	65.15	81.3	60.04	3.68	4.31	4.72	4.52
8976	0	1	0	0.238	0.425	0.487	0.536	0.619	69.24	66.61	84.55	65.29	53.507	2.57	4.59	4.75	4.48	4.09	0.229	0.377	0.287	0.191	47.911	61.354	56.477	41.222	4.69	4.37	4.08	4.24
5625	1	0	0	0.49	0.502	0.334	0.214	0.318	32.933	41.981	62.718	48.053	50.04	3.96	4.74	5.55	3.42	4.35	#NULL!	#NULL!	#NULL!	#NULL!	#NULL!	#NULL!	#NULL!	#NULL!	#NULL!	#NULL!	#NULL!	#NULL!
2674	1	0	0	0.314	0.218	0.428	0.21	0.206	43.231	24.914	39.145	35.321	29.362	4.12	2.9	3.88	3.23	3.64	#NULL!	#NULL!	#NULL!	#NULL!	#NULL!	#NULL!	#NULL!	#NULL!	#NULL!	#NULL!	#NULL!	#NULL!
